# Supplementary material
Source: HighWire-hosted journal article supplement (http://www.cmaj.ca/highwire/filestream/58719/field_highwire_adjunct_files/8/insulin-yu-9-at.pdf)
Supplement: insulin-yu-9-at.pdf [file insulin-yu-9-at.pdf]

## Appendix 9: Initiation of insulin therapy in older adults

Given the presence of comorbidities as well as the risk and consequences of hypoglycemia in older adults (defined by most studies as people aged 65 or older), insulin therapy should be initiated with particular care in this population. However, insulin initiation can be safely done in the primary care setting<sup>1,2</sup> and does not negatively affect the quality of life of patients.<sup>1,3</sup>

### *Which insulin regimen should be used?*

There is conflicting evidence regarding the effectiveness of combination therapy with insulin glargine and oral antihyperglycemic agents (OAHAs) versus premixed insulin twice daily. Although both regimens have been found to reduce glycolated hemoglobin A<sub>1c</sub> (HbA<sub>1c</sub>) values, one study showed greater HbA<sub>1c</sub> reduction<sup>4</sup> with glargine, whereas the other showed greater HbA<sub>1c</sub> reduction with premixed insulin.<sup>5</sup> Combination therapy with insulin glargine and OAHAs resulted in fewer hypoglycemic episodes<sup>1,4,5</sup> and less weight gain<sup>1,5</sup> than premixed therapy. There was no difference in glycemic control or in risk of hypoglycemic episodes between morning and bedtime administration of intermediate-acting insulin.<sup>6</sup> A six-month study showed that oral antihyperglycemic agents and a basal-bolus regimen improved glycemic control and mood, whereas a regimen of twice-daily NPH did not.<sup>7</sup>

### *Should OAHA therapy be continued?*

The addition of once-daily injection of NPH while continuing a sulfonylurea in the older adult population resulted in glycemic control comparable to that with a regimen of NPH twice daily.<sup>8</sup> Although the addition of insulin glargine to OAHA therapy resulted in a reduction in HbA<sub>1c</sub> similar to that achieved with intensification of OAHA therapy, it resulted in a significantly greater reduction in fasting blood glucose levels and hypoglycemic episodes.<sup>9</sup>

Overall, initiation of insulin in older adults is safe and effective. A regimen of long-acting insulin once daily in addition to OAHA therapy appears to be effective and is associated with fewer hypoglycemic episodes than with premixed therapy. However, because there is not enough evidence available to suggest the optimal regimen in this patient population, the choice of insulin should be made based on the individual patient's characteristics and preference. Continuing OAHA therapy appears to be safe in older adults when starting an insulin regimen of intermediate- or long-acting insulin.

## References

1. Taylor R, Foster B, Kyne-Grzebalski D, Vanderpump M. Insulin regimens for the non-insulin dependent: impact on diurnal metabolic state and quality of life. *Diabet Med* 1994 Jul;11(6):551-7.
2. Tovi J, Furhoff AK, Lennerhagen P, Engfeldt P. Starting insulin therapy in elderly non-insulin-dependent diabetic patients at a health care centre. Methodological and economic aspects. *Scand J Prim Health Care* 1997 Jun;15(2):87-91.
3. Elgrably F, Costagliola D, Chwalow AJ, Varenne P, Slama G, Tchobroutsky G. Initiation of insulin treatment after 70 years of age: patient status 2 years later. *Diabet Med* 1991 Oct;8(8):773-7.
4. Janka HU, Plewe G, Busch K. Combination of oral antidiabetic agents with basal insulin versus premixed insulin alone in randomized elderly patients with type 2 diabetes mellitus. *J Am Geriatr Soc* 2007 Feb;55(2):182-8.

5. Wolffenbittel BH, Klaff LJ, Bhushan R, Fahrbach JL, Jiang H, Martin S. Initiating insulin therapy in elderly patients with Type 2 diabetes: efficacy and safety of lispro mix 25 vs. basal insulin combined with oral glucose-lowering agents. *Diabet Med* 2009 Nov;26(11):1147-55.
6. Niskanen L, Lahti J, Uusitupa M. Morning or bed-time insulin with or without glibenclamide in elderly type 2 diabetic patients unresponsive to oral antidiabetic agents. *Diabetes Res Clin Pract* 1992 Dec;18(3):185-90.
7. Hendra TJ, Taylor CD. A randomised trial of insulin on well-being and carer strain in elderly type 2 diabetic subjects. *J Diabetes Complications* 2004 May;18(3):148-54.
8. Wolffenbittel BH, Sels JP, Rondas-Colbers GJ, Menheere PP, Nieuwenhuijzen Kruseman AC. Comparison of different insulin regimens in elderly patients with NIDDM. *Diabetes Care* 1996 Dec;19(12):1326-32.
9. Papa G, Fedele V, Chiavetta A, Lorenti I, Leotta C, Luca S, et al. Therapeutic options for elderly diabetic subjects: open label, randomized clinical trial of insulin glargine added to oral antidiabetic drugs versus increased dosage of oral antidiabetic drugs. *Acta Diabetol* 2008 Mar;45(1):53-9.
